# Supplementary material for: Mismatch repair markers in preoperative and operative endometrial cancer samples; expression concordance and prognostic value
Source: PubMed Central journal article supplement (PMC9938259; doi:10.1038/s41416-022-02063-3), 2022-12-08
Supplement: 41416_2022_2063_MOESM2_ESM.pdf [file 41416_2022_2063_MOESM2_ESM.pdf]

**Supplementary Table 1.** MMR protein expression levels associates with clinicopathological variables in hysterectomy specimens

| Variable                       | MSH6         |                |                   | MSH2         |               |                   | PMS2         |               |                   | MLH1         |               |                   |
|--------------------------------|--------------|----------------|-------------------|--------------|---------------|-------------------|--------------|---------------|-------------------|--------------|---------------|-------------------|
|                                | Low<br>n (%) | High,<br>n (%) | P-value           | Low<br>n (%) | High<br>n (%) | P-value           | Low<br>n (%) | High<br>n (%) | P-value           | Low<br>n (%) | High<br>n (%) | P-value           |
| <b>Number of patients</b>      | 380          | 332            |                   | 502          | 261           |                   | 265          | 236           |                   | 346          | 357           |                   |
| <b>Age</b>                     |              |                | <b>0.001</b>      |              |               | <b>0.006</b>      |              |               | <b>0.039</b>      |              |               | 0.894             |
| < 66                           | 214 (60)     | 145 (40)       |                   | 278 (70)     | 117 (30)      |                   | 148 (57)     | 110 (43)      |                   | 182 (50)     | 186 (50)      |                   |
| ≥ 66                           | 166 (47)     | 187 (53)       |                   | 224 (61)     | 144 (39)      |                   | 117 (48)     | 126 (52)      |                   | 164 (49)     | 171 (51)      |                   |
| <b>Histologic type*</b>        |              |                | <b>&lt; 0.001</b> |              |               | <b>&lt; 0.001</b> |              |               | <b>&lt; 0.001</b> |              |               | <b>&lt; 0.001</b> |
| Endometrioid                   | 335 (58)     | 239 (42)       |                   | 434 (71)     | 177 (29)      |                   | 220 (59)     | 156 (41)      |                   | 296 (53)     | 264 (47)      |                   |
| Non-endometrioid               | 45 (33)      | 93 (67)        |                   | 68 (45)      | 84 (55)       |                   | 45 (36)      | 80 (64)       |                   | 50 (35)      | 93 (65)       |                   |
| Clear cell                     | 17 (63)      | 10 (37)        |                   | 22 (76)      | 7 (24)        |                   | 4 (21)       | 15 (79)       |                   | 12 (44)      | 15 (56)       |                   |
| Serous papillary               | 17 (27)      | 47 (73)        |                   | 28 (38)      | 45 (62)       |                   | 25 (38)      | 41 (62)       |                   | 23 (34)      | 45 (66)       |                   |
| Carcinosarcoma                 | 8 (24)       | 26 (77)        |                   | 10 (29)      | 25 (71)       |                   | 11 (39)      | 17 (61)       |                   | 9 (27)       | 24 (73)       |                   |
| Undifferentiated/other         | 3 (23)       | 10 (77)        |                   | 8 (53)       | 7 (47)        |                   | 5 (42)       | 7 (58)        |                   | 6 (40)       | 9 (60)        |                   |
| <b>Histologic grade**</b>      |              |                | <b>0.016</b>      |              |               | <b>0.038</b>      |              |               | 0.662             |              |               | 0.781             |
| Grade 1-2                      | 285 (61)     | 181 (39)       |                   | 361 (73)     | 132 (27)      |                   | 174 (59)     | 121 (41)      |                   | 240 (53)     | 212 (47)      |                   |
| Grade 3                        | 47 (48)      | 51 (52)        |                   | 67 (63)      | 39 (37)       |                   | 41 (56)      | 32 (44)       |                   | 50 (51)      | 47 (49)       |                   |
| <b>Myometrial infiltration</b> |              |                | 0.531             |              |               | 0.648             |              |               | 0.909             |              |               | 0.066             |
| < 50%                          | 238 (54)     | 202 (46)       |                   | 307 (67)     | 154 (33)      |                   | 169 (53)     | 148 (47)      |                   | 207 (47)     | 238 (54)      |                   |
| ≥ 50%                          | 139 (52)     | 130 (48)       |                   | 193 (65)     | 104 (35)      |                   | 95 (53)      | 85 (47)       |                   | 137 (54)     | 118 (46)      |                   |
| <b>FIGO stage</b>              |              |                | <b>0.001</b>      |              |               | <b>0.039</b>      |              |               | 0.480             |              |               | 0.861             |
| I-II                           | 334 (56)     | 262 (44)       |                   | 431 (67)     | 209 (33)      |                   | 223 (54)     | 193 (46)      |                   | 293 (49)     | 304 (51)      |                   |
| III-IV                         | 46 (40)      | 70 (60)        |                   | 71 (58)      | 52 (42)       |                   | 42 (49)      | 43 (51)       |                   | 53 (50)      | 53 (50)       |                   |
| <b>Ploidy</b>                  |              |                | <b>&lt; 0.001</b> |              |               | <b>&lt; 0.001</b> |              |               | <b>0.011</b>      |              |               | 0.071             |
| Diploid                        | 191 (56)     | 151 (44)       |                   | 257 (68)     | 124 (33)      |                   | 139 (57)     | 105 (43)      |                   | 179 (52)     | 166 (48)      |                   |
| Aneuploid                      | 33 (32)      | 69 (68)        |                   | 52 (46)      | 60 (54)       |                   | 32 (40)      | 47 (60)       |                   | 43 (42)      | 60 (58)       |                   |
| <b>Metastatic lymph nodes</b>  |              |                | <b>0.022</b>      |              |               | <b>0.003</b>      |              |               | 0.901             |              |               | 0.349             |
| Negative                       | 273 (54)     | 228 (46)       |                   | 373 (69)     | 167 (31)      |                   | 189 (54)     | 160 (46)      |                   | 245 (49)     | 259 (51)      |                   |
| Positive                       | 27 (40)      | 41 (60)        |                   | 36 (51)      | 34 (49)       |                   | 27 (55)      | 22 (45)       |                   | 33 (55)      | 27 (45)       |                   |

FIGO: International Federation of Gynaecologist and Obstetrics, n: number of patients, MSH6: MutS homolog 6, MSH2: MutS homolog 2, PMS2: PMS1 homolog 2, MLH1: MutL homolog 1  
MSH6, MSH2, MLH1; Low: SI 0-4, high: SI 6-9, PMS2; Low: SI 0-3, high: SI 4-9.

\*Comparing endometrioid vs. non-endometrioid

\*\*Only endometrioid histology

Data missing on histologic grade for 10 (MSH6), 12 (MSH2), 8 (PMS2), and 11 (MLH1) patients, myometrial infiltration for 3 (MSH6), 11 (MSH2), 5 (PMS2), and 3 (MLH1) patients, ploidy for 268 (MSH6), 270 (MSH2), 323 (PMS2), and 255 (MLH1) patients, metastatic lymph nodes for 143 (MSH6), 153 (MSH2), 103 (PMS2), and 139 (MLH1) patients.

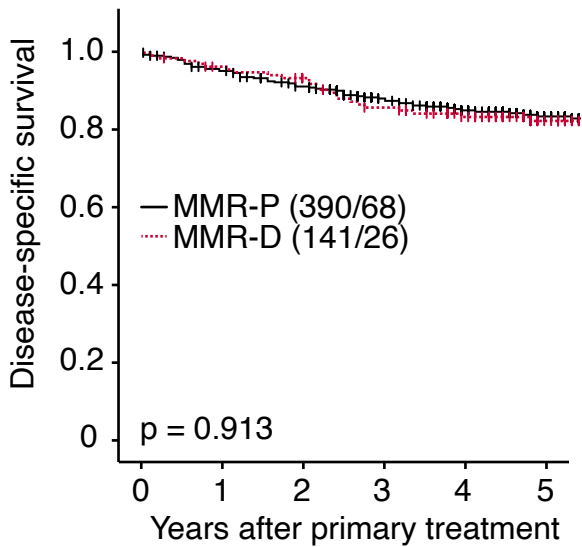

**Supplementary Figure 1.** No difference in survival outcomes between patients with MMR-P and MMR-D status in curettage samples. MMR-D: mismatch repair deficient, defined by loss of either MSH6, MSH2, PMS2 or MLH1. MMR-P: mismatch repair proficient. P-values are given by log-rank (Mantel-Cox) analysis. Number in brackets indicates total number of patients/number of events.

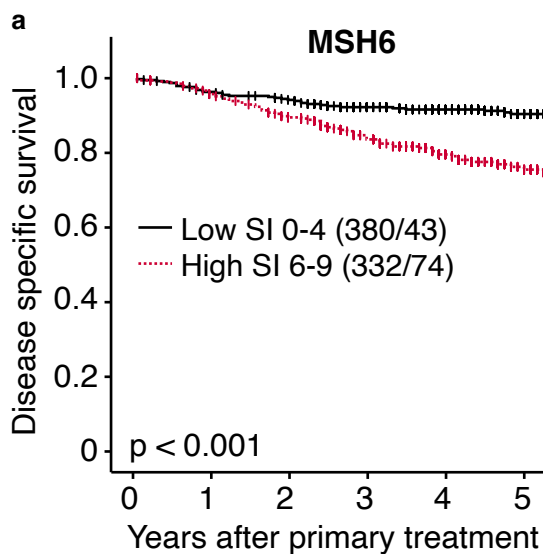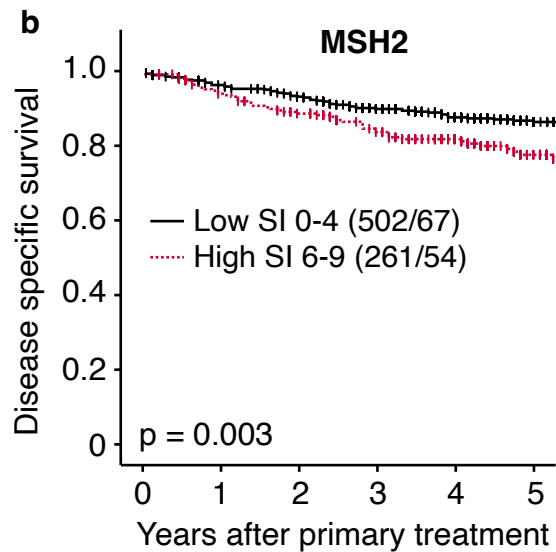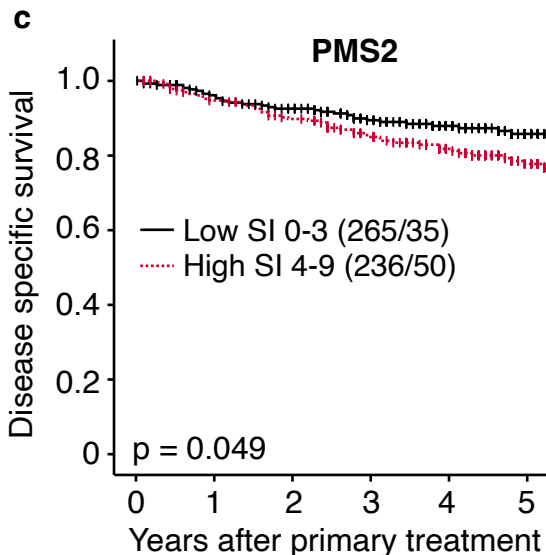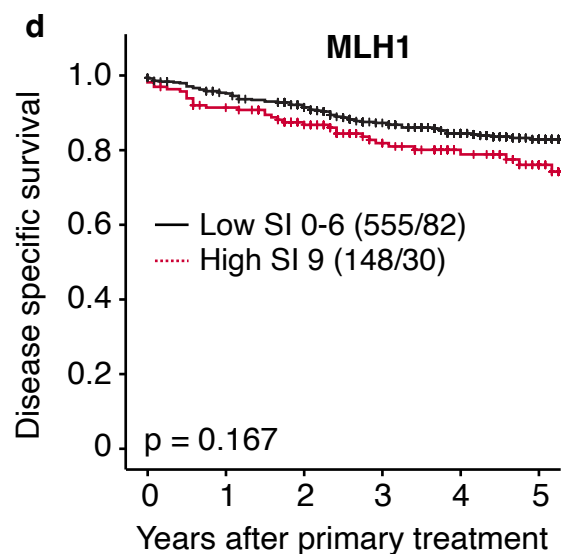

**Supplementary Figure 2. Expression of MSH6, MSH2 and PMS2 is prognostic in hysterectomy specimen.** High expression of MSH6 (a), MSH2 (b) or PMS2 (c) in hysterectomy was associated with poor outcome in endometrial cancer. MLH1 expression (d) was not associated with survival. P-values are given by log-rank (Mantel-Cox) analysis. Number in brackets indicates total number of patients/number of events. Abbreviations: MutS Homolog 6 (MSH6), MutS Homolog 2 (MSH2), PMS2 Homolog 2 (PMS2), MutL Homolog 1 (MLH1).

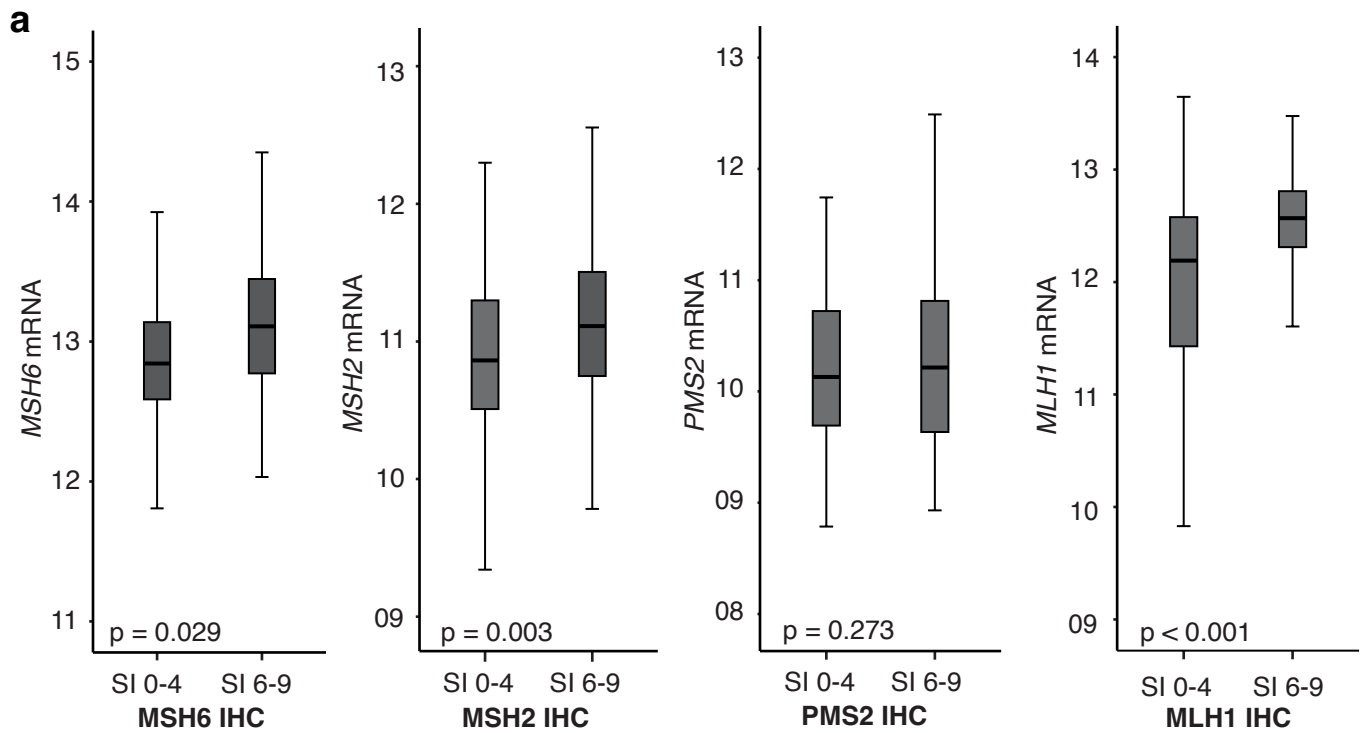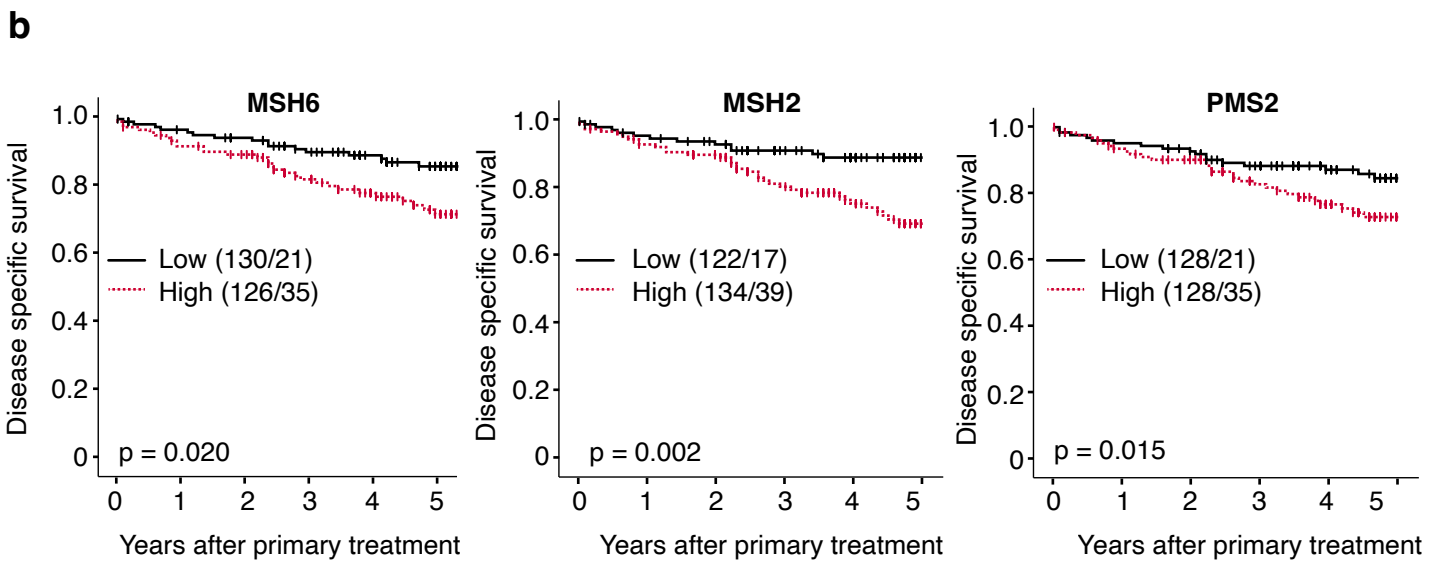

**Supplementary Figure 3. MSH6, MSH2 and PMS2 mRNA expression is prognostic in hysterectomy specimen.** *MSH6*, *MSH2*, *MLH1* or *PMS2* (median) mRNA expression in relation to corresponding immunohistochemical protein levels (median) in hysterectomy tissue (a). mRNA expression of *MSH6*, *MSH2* and *PMS2* associated with disease-specific survival in hysterectomy samples (b). Median was used as cut-off for low and high expression groups. P-values are given by log-rank (Mantel-Cox) analysis. Number in brackets indicates total number of patients/number of events. Abbreviations: MutS Homolog 6 (*MSH6*), MutS Homolog 2 (*MSH2*), PMS2 Homolog 2 (*PMS2*).
